# Supplementary material
Source: HighWire-hosted journal article supplement (https://www.cmajopen.ca/highwire/filestream/89382/field_highwire_adjunct_files/4/open-2022-0072-strobe-checklist.pdf)
Supplement: open-2022-0072-strobe-checklist.pdf [file open-2022-0072-strobe-checklist.pdf]

## STROBE checklist items

### **Title and abstract**

- 1 a : Page 1, title
- 1 b : Page 1, paragraph 2 (Abstract → Methods)

### **Introduction**

- Background/Rationale (2) : Page 1, paragraph 5 + Page 2 paragraphs 1 + 2
- Objectives (3) : Page 2, paragraph 3

### **Methods**

- Study design (4) : Page 2, paragraph 4
- Setting (5) : Page 2, paragraph 4, page 3, paragraph 1
- Participants (6) : Page 2, paragraph 4
- Variables (7) : Page 3, paragraph 1, 2, 3
- Data sources/measurement (8) : Page 3, paragraph 1, 2, 3
- Bias (9) : Page 3, paragraph 1
- Study size (10) : Page 2, paragraph 4
- Quantitative variables (11) : Page 3, paragraphs 1, 2, 3
- Statistical methods (12) : Page 3, paragraphs 4, page 4, paragraph 1

### **Results**

- Participants (13) : Page 4, paragraph 2
- Descriptive data (14) : Page 5, paragraphs 1, 2, Table 1
- Outcome data (15) : Page 4, paragraph 2
- Main results (16) : Page 4, paragraphs 2, 3 and page 5, paragraphs 1, 2
- Other analyses (17) : Page 4, paragraphs 2, 3 and page 5, paragraphs 1, 2

### **Discussion**

- Key results (18) : Page 5, paragraph 3
- Limitations (19) : Page 7, paragraph 3
- Interpretation (20) : Page 7, paragraph 4
- Generalisability (21) : Page 7, paragraph 4

### **Other information**

- Funding (22) : Page 8, paragraph 1
